# Supplementary material for: Establishment of Pancreatobiliary Cancer Zebrafish Avatars for Chemotherapy Screening
Source: MDPI journal article supplement (doi:10.3390/cells10082077), 2021-08-13
Supplement: s1 [file s1]

Figure S1

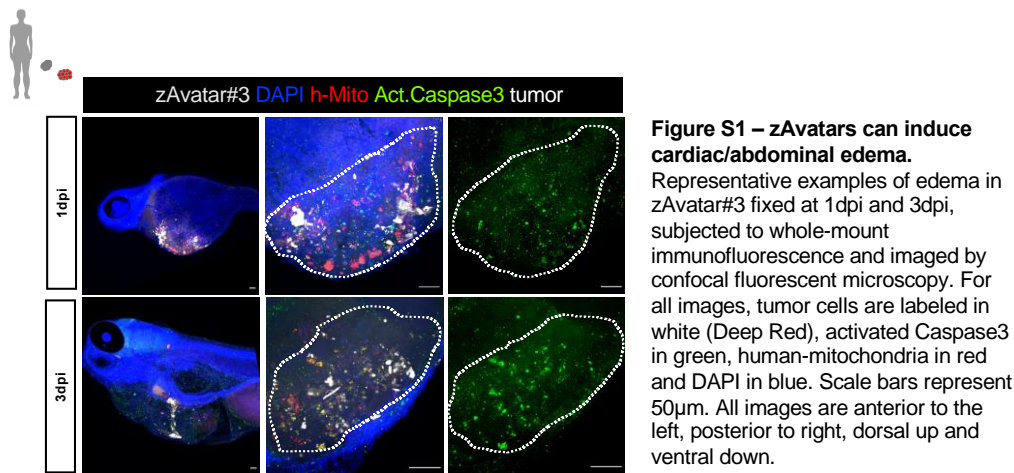

Figure S2

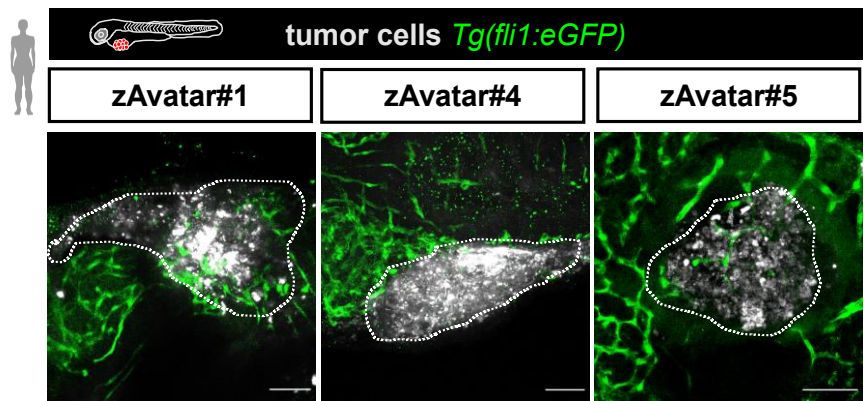

## Figure S3

| Giemsa Slide ID | Dx extended               | Cytopathology |                 |              |                 |          |                   |                        |                  |                                  | zPDX        |              |
|-----------------|---------------------------|---------------|-----------------|--------------|-----------------|----------|-------------------|------------------------|------------------|----------------------------------|-------------|--------------|
|                 |                           | cellularity   | cohesiveness    | naked nuclei | background      |          |                   |                        |                  | other comments                   | engraftment | angiogenesis |
|                 |                           |               |                 |              | nuclear tangles | necrosis | stromal fragments | inflammatory cells     | apoptotic debris |                                  |             |              |
| #1              | PDAC                      | -             | -               | -            | -               | -        | -                 | -                      | -                |                                  | 70%         | yes          |
| #2              | PDAC                      | high          | cohesive        | 20-50%       | few             | minimal  | few               | abundant (macrophages) | few              | polygonal cells predominant      | 42%         | yes          |
| #3              | PDAC                      | low           | poorly cohesive | abundant     | abundant        | moderate | abundant          | abundant (macrophages) | abundant         | a lot of cell debris             | edema       | -            |
| #4              | ampullary type            | moderate      | cohesive        | few (<10%)   | few             | minimal  | few               | few                    | few              | columnar cells predominant       | 42%         | yes          |
| #5              | ampullary type            | high          | cohesive        | 20-50%       | few             | minimal  | few               | few                    | few              | marked cellular atypia           |             |              |
| #6              | distal cholangiocarcinoma | moderate      | poorly cohesive | 20-50%       | moderate        | moderate | few               | few                    | moderate         | marked cellular atypia, bacteria | edema       | -            |

  

**Figure S3. Cytopathologic features of human pancreatobiliary tumors used to establish zAvatars.** After dissociation from the original tumor samples, smears were performed and stained with May-Grunwald-Giemsa for quality control analysis. Cellularity, cohesiveness, necrosis and presence of inflammatory were some of the parameters analyzed. We were not able to analyze smears for patient#1.

**Table S1.** Stock and working concentrations in patients of the antineoplastic drugs used.

| <b>Drug</b>  | <b>Stock concentration</b> | <b>Working concentration</b> |
|--------------|----------------------------|------------------------------|
| 5-FU         | 50 mg/mL                   | 426.2 $\mu$ M                |
| Oxaliplatin  | 5 mg/mL                    | 8.1 $\mu$ M                  |
| Irinotecan   | 20 mg/mL                   | 8 $\mu$ M                    |
| Folinic Acid | 10 mg/mL                   | 18.5 $\mu$ M                 |
| Gemcitabine  | 40 mg/mL                   | 160 $\mu$ M                  |
| Paclitaxel   | 6 mg/mL                    | 475 $\mu$ g/mL               |

**Table S2.** Composition of media used for the generation of zAvatars.

|                          | <b>Reagent</b>                         | <b>Supplier</b>   | <b>Final concentration</b> |
|--------------------------|----------------------------------------|-------------------|----------------------------|
| <b>Collection medium</b> | Advanced DMEM/F-12                     | Gibco             | -                          |
|                          | Penicillin-Streptomycin                | Sigma-Aldrich     | 100U/mL                    |
|                          | Amphotericin B solution                | Sigma-Aldrich     | 100 $\mu$ g/mL             |
|                          | Kanamycin solution                     | Sigma-Aldrich     | 100 $\mu$ g/mL             |
|                          | Gentamicin solution                    | Sigma-Aldrich     | 500 $\mu$ g/mL             |
|                          | Amoxicillin/Clavulanic acid            | Clavepen          | 220 $\mu$ g/mL             |
|                          | Metronidazole                          | Braun             | 80 $\mu$ g/mL              |
| <b>Mix 1</b>             | DMEM F12                               | Gibco             |                            |
|                          | HEPES                                  | ThermoFisher      | 1%                         |
|                          | Glutagro supplement                    | Corning           | 1%                         |
|                          | FBS (fetal bovine serum)               | Gibco             | 40%                        |
|                          | Primocin                               | Invivogen         | 100 $\mu$ g/mL             |
|                          | Anoikis inhibitor                      | Sigma-Aldrich     | 10 $\mu$ M                 |
|                          | Putrescine                             | Sigma-Aldrich     | 10 $\mu$ g/mL              |
|                          | p38 inhibitor                          | Sigma-Aldrich     | 10 $\mu$ M                 |
|                          | Epidermal Growth Factor (EGF)          | PeproTech         | 50ng/mL                    |
|                          | N-acetylcysteine                       | Sigma-Aldrich     | 1mM                        |
|                          | Insulin-transferrin-selenium           | Corning           | 1%                         |
|                          | Nicotinamide                           | Sigma-Aldrich     | 10mM                       |
| <b>Mix2</b>              | Ethylenediaminetetraacetic acid (EDTA) | Sigma             | 2mM                        |
|                          | Liberase TM                            | Roche             | 50ug/mL                    |
|                          | DNase                                  | ThermoFisher      | 5U/mL                      |
|                          | Cell tracker Deep Red                  | Life Technologies | 1 $\mu$ L/mL               |
